# Supplementary material for: Arctic marine heatwaves forced by greenhouse gases and triggered by abrupt sea-ice melt
Source: Springer Nature journal article supplement (doi:10.1038/s43247-024-01215-y), 2024-02-13
Supplement: MOESM2 [file 43247_2024_1215_MOESM2_ESM.pdf]

## Supplementary Material

# Arctic marine heatwaves forced by greenhouse gases and triggered by early sea-ice melt

Armineh Barkhordarian<sup>1,\*</sup>, David M. Nielsen<sup>1,2</sup>, Dirk Olonscheck<sup>2</sup>, and Johanna Baehr<sup>1</sup>

<sup>1</sup>Institute of Oceanography, Center for Earth System Research and Sustainability (CEN),  
Universität Hamburg, Hamburg, Germany

<sup>2</sup>Max Planck Institute for Meteorology, Hamburg, Germany

\*[armineh.barkhordarian@uni-hamburg.de](mailto:armineh.barkhordarian@uni-hamburg.de)

December 17, 2023

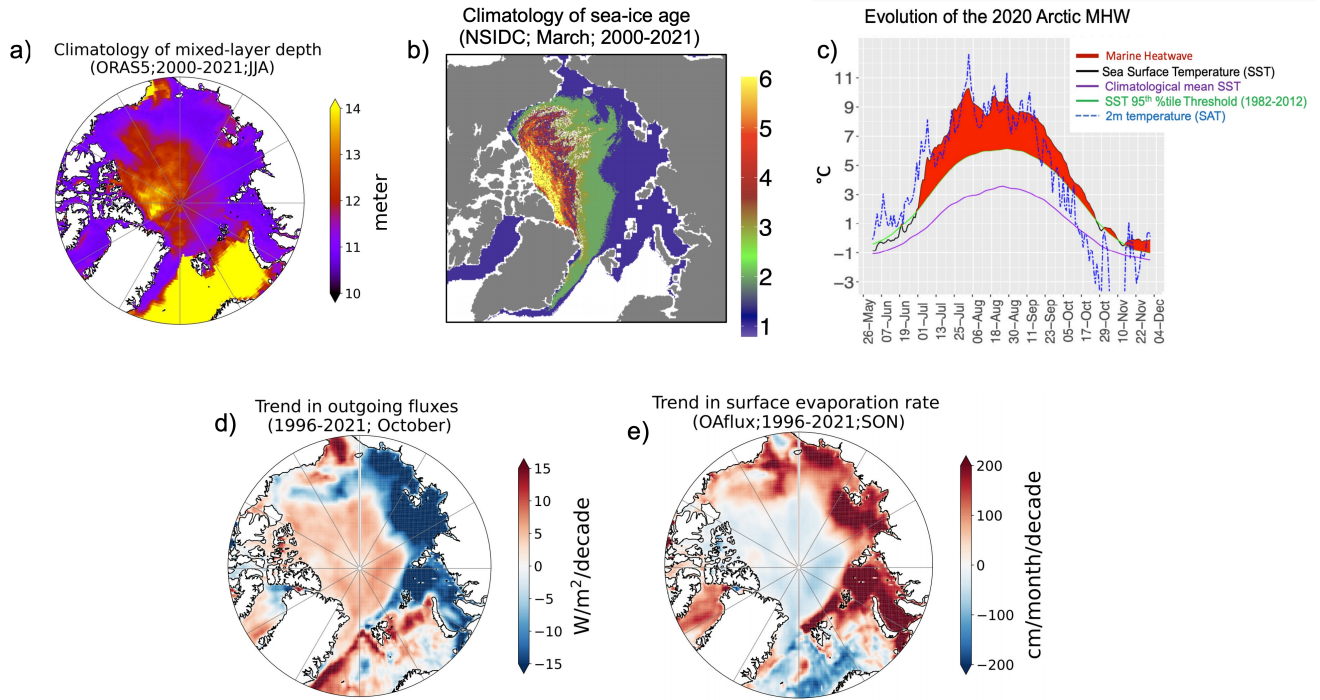

Supplementary Figure 1: **a)** Climatology of mixed-layer depth in JJA (June-August) over 2000-2021 based on ORAS5 reanalysis. **b)** Climatology of sea-ice age in March over 2000-2021 based on NSIDC dataset. **c)** Evolution of the 2020 marine heatwave over the Kara Sea. **d)** Long-term trend over 1996-2021 in maximum outgoing fluxes in October (longwave radiation + sensible heat + latent heat fluxes;  $\text{Wm}^{-2}\text{decade}^{-1}$ ) according to ERA5 reanalysis. **e)** Long-term trend over 1996-2021 in evaporation rate (SON;  $\text{cm month}^{-1}\text{decade}^{-1}$ ) based on Oaflux dataset.
